# Supplementary material for: The communication of physical science uncertainty in European National Adaptation Strategies
Source: PubMed Central journal article supplement — Clim Change. 2013 Jul 27;132(1):143–55. doi: 10.1007/s10584-013-0809-1 (PMC4555652; doi:10.1007/s10584-013-0809-1), 2013-07-27
Supplement: 10584_2013_809_MOESM1_ESM.pdf [file 10584_2013_809_MOESM1_ESM.pdf]

# The communication of physical science uncertainty in European National Adaptation Strategies

Lorenz, S.<sup>1</sup>, S. Dessai<sup>1</sup>, J. Paavola<sup>1</sup> and P.M. Forster<sup>1</sup>

<sup>1</sup> School of Earth and Environment and Centre for Climate Change Economics and Policy, University of Leeds, Leeds, LS2 9JT, UK

Corresponding Author: Susanne Lorenz, [ee08sl@leeds.ac.uk](mailto:ee08sl@leeds.ac.uk), +44(0) 113 34 39085

**Journal: Climatic Change**

**Table A** Key features of European NAS analysed in this study

|            | Country     | Title                                                                     | Year | Coordinating Body                                                            | Number of pages of strategy document                           | Action plans                                                                                         |
|------------|-------------|---------------------------------------------------------------------------|------|------------------------------------------------------------------------------|----------------------------------------------------------------|------------------------------------------------------------------------------------------------------|
| <b>BEL</b> | Belgium     | National climate change adaptation strategy                               | 2010 | Flemish Nature, Environment and Energy Department                            | 51                                                             | National adaptation plan expected end of 2012                                                        |
| <b>DEN</b> | Denmark     | Strategy for adaptation to a changing climate                             | 2008 | Danish Energy Agency                                                         | 47                                                             | National action plan expected during 2012                                                            |
| <b>ENG</b> | England     | Framework for action for adapting to climate change in England            | 2008 | Department for Environment, Food and Rural Affairs                           | 51                                                             | National adaptation plan for the UK expected in 2013                                                 |
| <b>FIN</b> | Finland     | National strategy for adaptation to climate change                        | 2005 | Ministry of Agriculture and Forestry of Finland                              | 280                                                            | <i>Action plan published in 2008</i>                                                                 |
| <b>FRA</b> | France      | National climate change impact adaptation plan                            | 2006 | Ministry of Ecology, Sustainable Development, Transport and Housing          | 72                                                             | <i>Strategy already contains very detailed actions and delivery partners</i>                         |
| <b>GER</b> | Germany     | Strategy for adaptation to climate change                                 | 2008 | Federal Ministry for the Environment, Nature Conservation and Nuclear safety | 73                                                             | <i>Adaptation action plan published in 2011</i>                                                      |
| <b>HUN</b> | Hungary     | National climate change strategy (NCCS) (extensive chapter on adaptation) | 2008 | Ministry for Environment and Water Department of Environmental Development   | 114 (20pp on adaptation specifically)                          | National adaptation strategic framework is planned as part of the first revision of the NCCS in 2013 |
| <b>NEL</b> | Netherlands | National adaptation strategy                                              | 2007 | Ministry of Housing, Spatial Planning and the Environment                    | Inter-administrative policy paper (16), Policy memorandum (42) | Action plans are currently being undertaken                                                          |
| <b>SCO</b> | Scotland    | Climate change adaptation framework                                       | 2009 | The Scottish Government                                                      | 34                                                             | National adaptation plan for the UK expected in 2013                                                 |
| <b>WAL</b> | Wales       | Climate change strategy (extensive chapter on adaptation)                 | 2010 | Welsh Assembly Government                                                    | 110 (22pp on adaptation specifically)                          | <i>Welsh adaptation delivery plan</i><br>National adaptation plan for the UK expected in 2013        |
